# Supplementary material for: Multiomics Analysis of a DNAH5-Mutated PCD Organoid Model Revealed the Key Role of the TGF-β/BMP and Notch Pathways in Epithelial Differentiation and the Immune Response in DNAH5-Mutated Patients
Source: Cells. 2022 Dec 12;11(24):4013. doi: 10.3390/cells11244013 (PMC9776854; doi:10.3390/cells11244013)
Supplement: Supplementary file 1 [file cells-11-04013-s001.zip]

Archive with 13 entries (13 files):
- Figure S1.tif
- Figure S2.tif
- Supplementary figure legend.pdf
- Table S1 primers.xlsx
- Table S2 Cytokine array.xlsx
- Vedio S1 CTRL.wmv
- Vedio S2 DNAH5 Mutation.wmv
- Vedio S3 Control.mp4
- Vedio S4 -Noggin-A8301.mp4
- Vedio S5 +DAPT.mp4
- Vedio S6 +DAPT-Noggin-A8301.mp4
- Vedio S7 +BMP4.mp4
- Vedio S8 +DAPT+BMP4-Noggin-A8301.mp4
