# Supplementary material for: Multiomics Analysis of a DNAH5-Mutated PCD Organoid Model Revealed the Key Role of the TGF-β/BMP and Notch Pathways in Epithelial Differentiation and the Immune Response in DNAH5-Mutated Patients
Source: Cells. 2022 Dec 12;11(24):4013. doi: 10.3390/cells11244013 (PMC9776854; doi:10.3390/cells11244013)
Supplement: Supplementary file 1 [file cells-11-04013-s001.zip › Table S1 primers.xlsx]

## Sheet: Sheet1
Primer name	Sequence (5' to 3')
GAPDH-F	GACTCATGACCACAGTCCATGC
GAPDH-R	AGAGGCAGGGATGATGTTCTG
KRT5-F	CTCAGTGGAGAAGGAGTTGGAC
KRT5-R	ACTGCTACCTCCGGCAAG
P63-F	CCACAGTACACGAACCTGGG
P63-R	CCGTTCTGAATCTGCTGGTCC
FOXJ1-F	GGCATAAGCGCAAACAGCCG
FOXJ1-R	TCGAAGATGGCCTCCCAGTCAAA
SCGB1A1-F	TCCTCCACCATGAAACTCGC
SCGB1A1-R	AGGAGGGTTTCGATGA CACG
MUC5AC-F	GCACCAACGACAGGAAGGATGAG
MUC5AC-R	CACGTTCCAGAGCCGGACAT
RSV-N-F	AGATCAACTTCTGTCATCCAGCAA
RSV-N-R	TTCTGCACATCATAATTAGGAGTATCAAT
RSVA-N-P	CACCATCCAACGGAGCACAGGAGAT
GM-CSF-F	ACTTCCTGTGCAACCCAGATT
GM-CSF-R	CTCATCTGGCCGGTCTCAC
G-CSF-F	TGGTGAGTGAGTGTGCCA
G-CSF-R	GGTAGAGGAAAAGGCCGCTA
CXCL8-F	ACTCCAAACCTTTCCACCCC
CXCL8-R	TTCTCAGCCCTCTTCAAAAACT
IL-6-F	TTCGGTCCAGTTGCCTTCTC
IL-6-R	CTGAGATGCCGTCGAGGATG
TNF-α-F	CACAGTGAAGTGCTGGCAAC
TNF-α-R	AGGAAGGCCTAAGGTCCACT
