# Supplementary material for: Multiomics Analysis of a DNAH5-Mutated PCD Organoid Model Revealed the Key Role of the TGF-β/BMP and Notch Pathways in Epithelial Differentiation and the Immune Response in DNAH5-Mutated Patients
Source: Cells. 2022 Dec 12;11(24):4013. doi: 10.3390/cells11244013 (PMC9776854; doi:10.3390/cells11244013)
Supplement: Supplementary file 1 [file cells-11-04013-s001.zip › Table S2 Cytokine array.xlsx]

## Sheet: Sheet1
(pg/ml)	Normal child RSV48h-1	Normal child RSV48h-2	Normal child RSV48h-3	DNAH5 child RSV48h-1	DNAH5 child RSV48h-2	DNAH5 child RSV48h-3
BLC	1.43234	1.44209	1.41285	0	0	0
Eotaxin	1.01949	1.17133	0.992695	12.4831	12.4071	7.94266
Eotaxin-2	13.4229	16.2249	16.3647	17.8315	24.9307	17.3519
G-CSF	2083.09	2150.41	1977.28	921.751	820.641	926.885
GM-CSF	21.5922	24.6819	20.6653	3.16195	3.27324	0.936147
I-309	2.24465	1.15654	2.44918	0	0	0
ICAM-1	1877.82	2006.54	2282.01	472.369	445.399	412.14
IFNg	1.80506	1.53185	0.275041	0	14.8744	6.25769
IL-1a	9.4399	8.2007	7.25891	18.3727	11.3818	15.0829
IL-1b	29.1552	32.092	37.8144	7.03621	9.28368	9.44357
IL-1ra	9.80801	8.17867	8.79937	1.69023	1.2722	0.749665
IL-2	28.7974	41.2043	32.123	0	4.10165	1.80742
IL-4	9.61824	9.91096	9.32552	2.56039	0	3.72564
IL-5	12.1889	12.3868	9.61653	0	0.41369	7.01449
IL-6	36.5856	34.3776	33.5644	0.607062	1.20717	2.04808
IL-6R	565.755	550.066	566.667	578.65	524.546	560.896
IL-7	4.86748	5.02181	4.7833	0	0.168602	0
IL-8	270.657	257.318	270.014	406.584	369.215	522.122
IL-10	2.91098	2.1763	2.44231	0	0	0
IL-11	35.2989	38.4252	35.1113	1.17732	4.56911	0
IL-12p40	2.18926	2.53594	2.3626	0	0	0.240108
IL-12p70	0.157765	0.223077	0.219594	0	0	0
IL-13	1.66503	1.05107	1.60922	1.2163	0.85822	0.669758
IL-15	7.2667	7.61703	7.39281	0	0	1.76474
IL-16	8.47917	9.43385	10.2067	0	8.19656	5.81352
IL-17	4.31894	4.86643	4.66568	1.47091	1.68785	1.10085
MCP-1	613.409	592.669	624.093	0	3.15664	7.3746
MCSF	13.9509	14.9476	15.8728	2.31528	2.32737	4.20767
MIG	7.18092	7.25735	7.21913	4.80262	2.57778	3.31939
MIP-1a	502.002	499.173	489.915	70.1348	73.4703	81.4122
MIP-1b	41.1143	38.0427	34.2385	8.97906	8.61061	8.99087
MIP-1d	7.07887	8.31484	7.00923	0.206665	0	0.0385562
PDGF-BB	2681.41	2700.01	2905.68	461.652	519.858	498.122
RANTES	2565.79	2810.73	2675.25	1612.12	1482.63	1454.37
TIMP-1	7690.91	9063.69	8262.82	8311.34	7115.74	7599.91
TIMP-2	7243.2	8057.35	7895.28	1385.93	1269.74	1476.28
TNFa	73.2247	75.869	71.3016	1.29706	0	0
TNFb	1178.29	1413.68	1101.94	0.723717	0	0
TNF RI	9792.64	9716.46	9784.52	7027.18	6667.02	7755.95
TNF RII	105.354	91.1143	118.987	5.48054	2.5309	7.03298
